# Supplementary material
Source: publisher site journal article supplement (https://www.dovepress.com/article/558345)
Supplement: Supplementary file 1 [file 558345_Supplementary%20file%20re-revised.docx]

**Supplementary file 1**

**Occupational Exposure Risk Awareness (OERAS) Scale for Medical Personnel in Disinfection Supply Centers**

**Questionnaire Items**

*(Likert Scale: 1 = Strongly Disagree → 5 = Strongly Agree*)

**Dimension 1: Occupational Exposure Knowledge**

1. I understand the definition and scope of occupational exposure.
2. I know common types of occupational exposure (e.g., needlestick injuries, chemical exposure).
3. I am aware of health risks caused by occupational exposure.
4. I know how to identify potential occupational exposure risks.
5. I understand proper handling of occupational exposure incidents.

**Dimension 2: Occupational Exposure Protection Measures**

1. I know how to use personal protective equipment (gloves, masks, etc.).
2. I understand basic principles of occupational exposure prevention.
3. I am familiar with workplace occupational exposure protection regulations.
4. I know how to properly handle and discard medical waste.
5. I can maintain good protective habits at work.

**Dimension 3: Response to Occupational Exposure Incidents**

1. I know emergency response steps after occupational exposure.
2. I understand medical treatment procedures after exposure.
3. I know who to report occupational exposure events to.
4. I understand required follow-up/monitoring post-exposure.
5. I know how to fill out occupational exposure report forms.

**Dimension 4: Training and Education**

1. I have received occupational exposure risk protection training.
2. The training content is practically helpful to me.
3. I have participated in occupational exposure protection drills.
4. My workplace provides sufficient occupational exposure education.
5. I understand latest occupational exposure protection knowledge.

**Scoring Protocol**

1. **Per Dimension**: Sum scores for all items within each dimension (Range: 5-25)
2. **Total Score**: Sum all 20 items (Range: 20-100)
3. **Interpretation**:
   - **20-49**: Low risk perception
   - **50-79**: Moderate risk perception
   - **80-100**: High risk perception

**Reliability & Validity Testing Protocols**

*(For research validation purposes)*

| **1. Reliability Test** | | |
| --- | --- | --- |
| **Method** | **Procedure** | **Acceptance Threshold** |
| Internal Consistency (Cronbach’s α) | Calculate α for each dimension and full scale using statistical software | ≥ 0.70 |
| Test-Retest Reliability | Administer twice (2-4 week interval). Calculate Pearson correlation (r) | ≥ 0.70 |
| Split-Half Reliability | Randomly divide items into two halves. Calculate Spearman-Brown coefficient | ≥ 0.70 |

| **2. Validity Tests** | | |
| --- | --- | --- |
| **Method** | **Procedure** | **Acceptance Criteria** |
| Content Validity (CVI) | Expert review of item relevance/representativeness | CVI ≥ 0.80 per item |
| Structural Validity | EFA: Principal Component Analysis with Varimax rotation; CFA: Validate factor structure | CFI/TLI ≥ 0.90; RMSEA ≤ 0.08 |
| Criterion Validity | Correlate total score with external measure (e.g., safety test) using Spearman’s ρ (non-parametric correlation for ordinal data) | ≥ 0.70 |
